# Supplementary material for: CsAg2Sb2I9 solar cells
Source: Royal Society of Chemistry journal article supplement (doi:10.1039/c8qi00309b), 2018-01-01
Supplement: c8qi00309b1.pdf [file c8qi00309b1.pdf]

## Supporting Information

### **CsAg<sub>2</sub>Sb<sub>2</sub>I<sub>9</sub> Solar Cells**

Zhimin Fang,<sup>‡ab</sup> Shizhe Wang,<sup>‡bc</sup> Shangfeng Yang<sup>\*a</sup> and Liming Ding<sup>\*b</sup>

*<sup>a</sup>Hefei National Laboratory for Physical Sciences at Microscale, Key Laboratory of Materials for Energy Conversion (CAS), University of Science and Technology of China, Hefei 230026, China. E-mail: sfyang@ustc.edu.cn*

*<sup>b</sup>Center for Excellence in Nanoscience (CAS), Key Laboratory of Nanosystem and Hierarchical Fabrication (CAS), National Center for Nanoscience and Technology, Beijing 100190, China. E-mail: ding@nanoctr.cn*

*<sup>c</sup>University of Chinese Academy of Sciences, Beijing 100049, China.*

<sup>‡</sup> Z. Fang and S. Wang contributed equally to this work.

## **Experimental section**

### **Preparation of the precursor solution**

The precursor solution was prepared by dissolving CsI, AgI and SbI<sub>3</sub> in DMF, and keeping AgI and SbI<sub>3</sub> with a concentration of 0.1 M. The solution was stirred at room temperature overnight inside a nitrogen glovebox. All the solutions were filtered with a 0.45 μm polytetrafluoroethylene (PTFE) filter.

### **Materials characterization**

Absorption spectra for perovskite films on glass were recorded on a Shimadzu UV-1800 spectrophotometer. Wide angle X-ray diffraction (XRD) patterns were obtained on D/MAX-TTRIII (CBO) with Cu Kα radiation ( $\lambda = 1.542 \text{ \AA}$ ) operating at 40 kV and 200 mA. Field emission scanning electron microscopy (FESEM) was performed on Hitachi SU-8220 operating at 5.0 kV. Atomic force microscopy (AFM) was performed on a Multimode microscope (Veeco) using tapping mode and a XE-7 scanning probe microscope in noncontact mode (Park Systems, Korea). Film thicknesses were measured with a profilometer (KLA Tencor D-120). XPS was measured on ESCALAB 250Xi.

### **Device fabrication and measurements**

Patterned ITO glass with a sheet resistance of  $15 \Omega \text{ sq}^{-1}$  was cleaned by ultrasonics in detergent, deionized water, acetone, isopropanol sequentially and then treated with UV-ozone for 10 min. The poly(3,4-ethylenedioxythiophene)-polystyrene sulfonate (PEDOT:PSS, Clevios<sup>TM</sup> PVP Al 4083) layer was formed by spin coating an aqueous dispersion onto ITO glass (4000 rpm for 30 s). PEDOT:PSS coated substrates were dried at 150 °C for 10 min, and then the substrates were transferred into a N<sub>2</sub> glovebox. Then the perovskite precursor solution was spin-coated onto PEDOT substrates at 3000 rpm for 30 s, and without post-annealing. PC<sub>61</sub>BM solution (20 mg/mL in chlorobenzene) was then spin-coated onto CsAg<sub>2</sub>Sb<sub>2</sub>I<sub>9</sub> layer at 1500 rpm for 30 s. Finally, aluminum (100 nm) was deposited onto PC<sub>61</sub>BM layer through a

shadow mask under vacuum (ca.  $10^{-4}$  Pa). The effective area for the devices is  $4 \text{ mm}^2$ .  $J$ - $V$  curves were measured by using a computerized Keithley 2400 SourceMeter and a Xenon-lamp-based solar simulator (Enli Tech, AM 1.5G,  $100 \text{ mW/cm}^2$ ). The illumination intensity of solar simulator was determined by using a monocrystalline silicon solar cell (Enli SRC2020,  $2 \text{ cm} \times 2 \text{ cm}$ ) calibrated by NIM. The external quantum efficiency (EQE) was measured by using a QE-R3011 measurement system (Enli Tech).

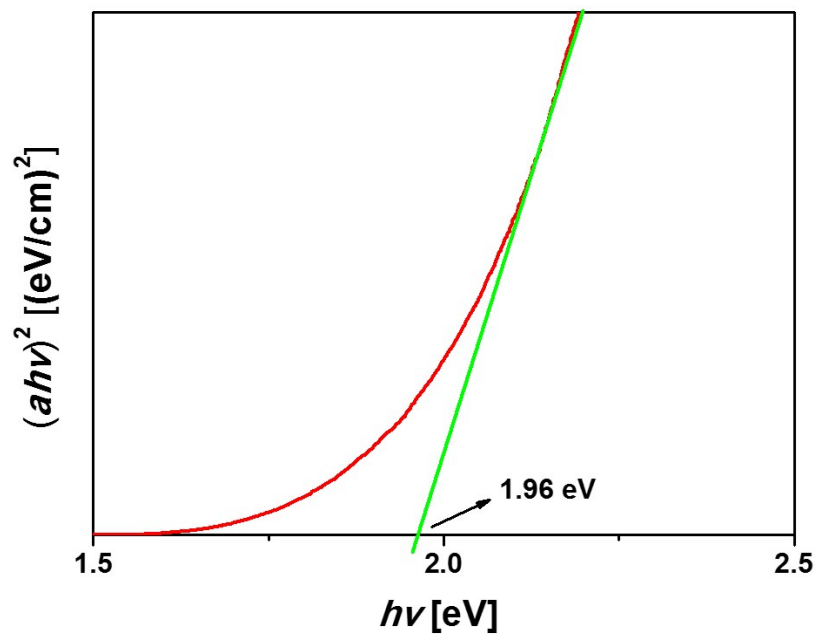

Fig. S1 Tauc plot for CsAg<sub>2</sub>Sb<sub>2</sub>I<sub>9</sub> film.

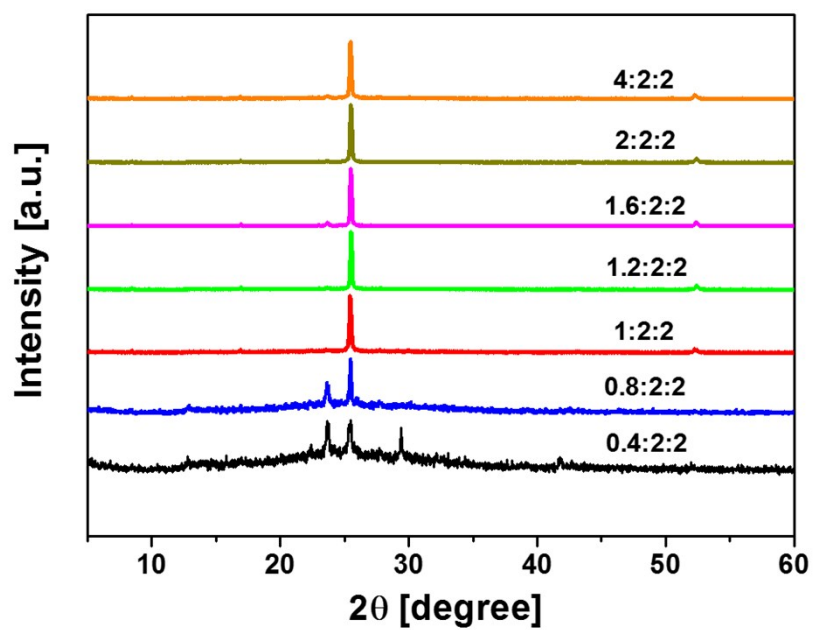

Fig. S2 XRD patterns for CsAg<sub>2</sub>Sb<sub>2</sub>I<sub>9</sub> films prepared with different molar ratios of CsI:AgI:SbI<sub>3</sub>.

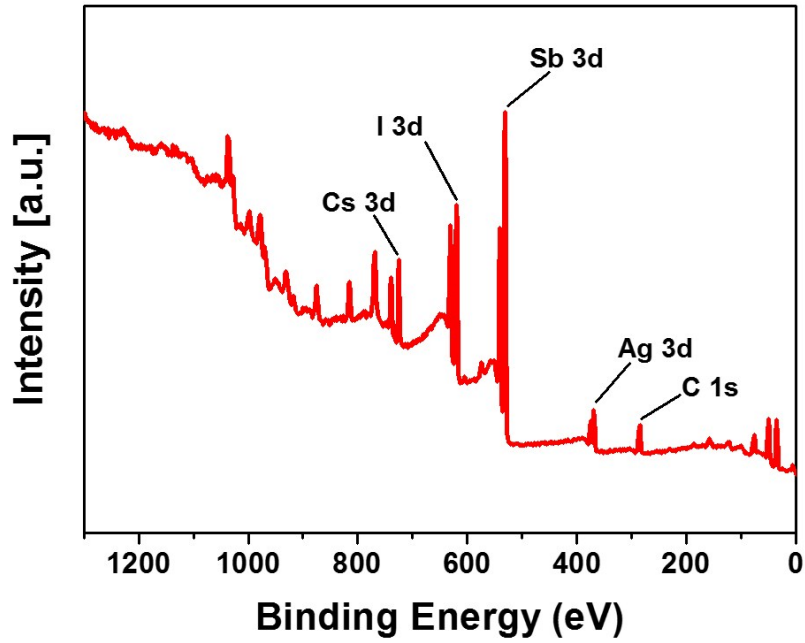

Fig. S3 XPS spectrum of  $\text{CsAg}_2\text{Sb}_2\text{I}_9$  film.

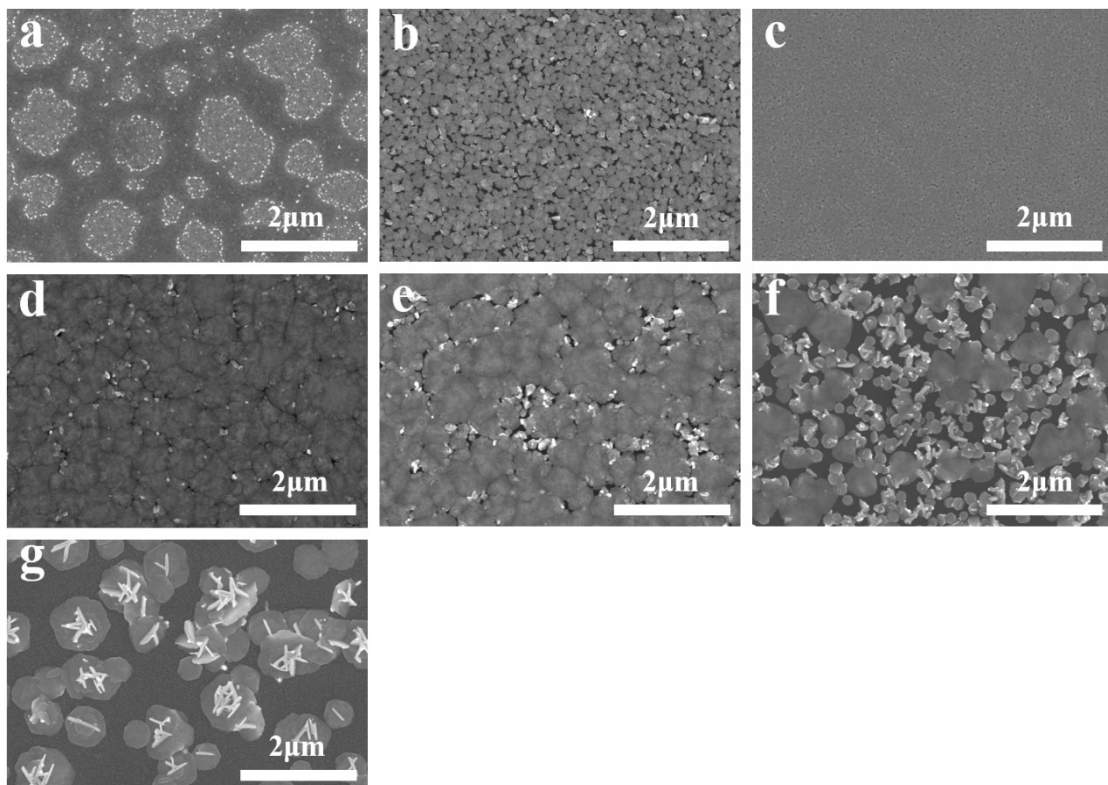

Fig. S4 SEM images for  $\text{CsAg}_2\text{Sb}_2\text{I}_9$  films prepared with different molar ratios of  $\text{CsI}:\text{AgI}:\text{SbI}_3$ : (a) 0.4:2:2, (b) 0.8:2:2, (c) 1:2:2, (d) 1.2:2:2, (e) 1.6:2:2, (f) 2:2:2, (g) 4:2:2.

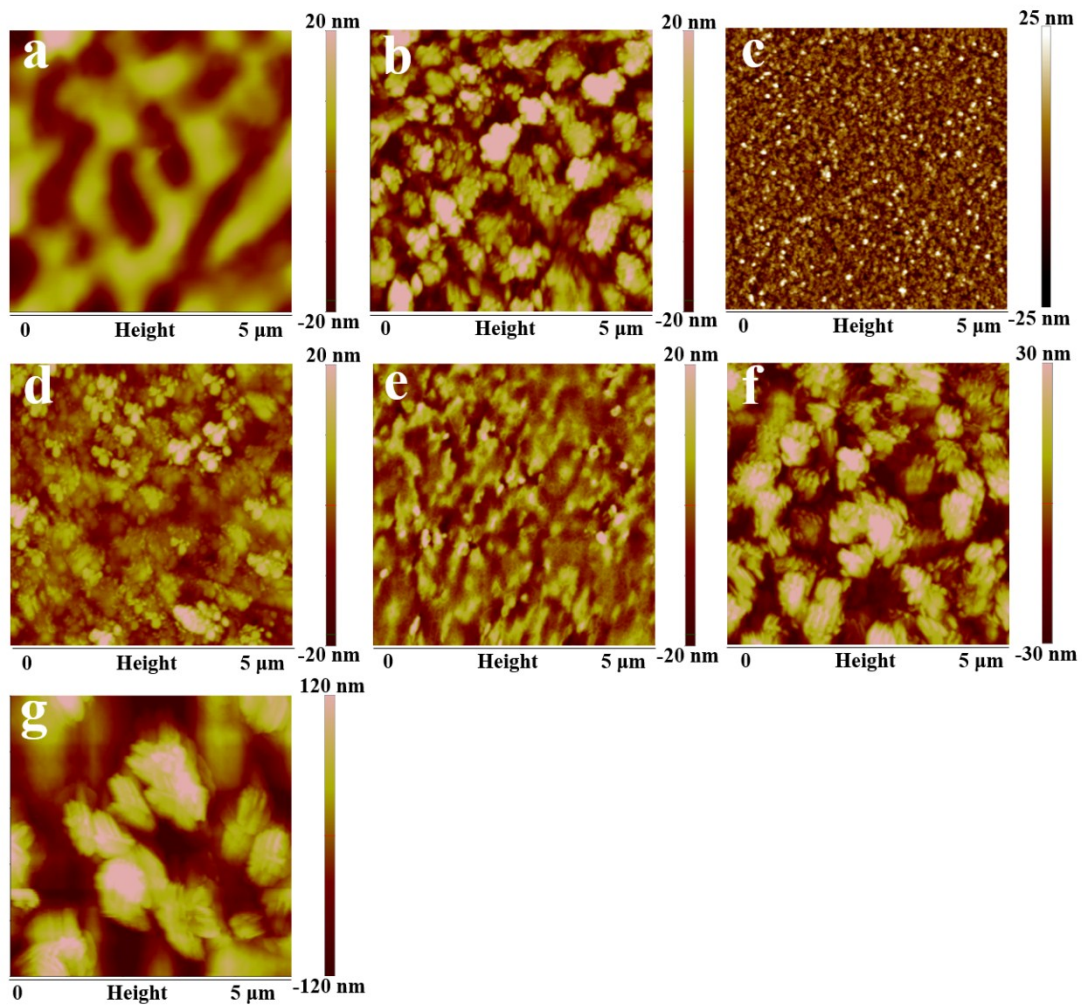

**Fig. S5** AFM images for  $\text{CsAg}_2\text{Sb}_2\text{I}_9$  films prepared with different molar ratios of  $\text{CsI}:\text{AgI}:\text{SbI}_3$ : (a) 0.4:2:2, (b) 0.8:2:2, (c) 1:2:2, (d) 1.2:2:2, (e) 1.6:2:2, (f) 2:2:2, (g) 4:2:2.

**Table S1** Effect of thickness on performance of CsAg<sub>2</sub>Sb<sub>2</sub>I<sub>9</sub> solar cells.

| Thickness | $V_{oc}$ | $J_{sc}$              | FF    | PCE                      |
|-----------|----------|-----------------------|-------|--------------------------|
| [nm]      | [V]      | [mA/cm <sup>2</sup> ] | [%]   | [%]                      |
| 122       | 0.81     | 1.53                  | 63.94 | 0.79 (0.74) <sup>a</sup> |
| 104       | 0.77     | 1.91                  | 67.10 | 0.99 (0.92)              |
| 94        | 0.79     | 1.72                  | 66.41 | 0.90 (0.86)              |
| 88        | 0.79     | 1.62                  | 65.95 | 0.84 (0.81)              |

<sup>a</sup>Data in parentheses stand for the average PCEs for 10 cells.

**Table S2** Effect of annealing temperature on performance of CsAg<sub>2</sub>Sb<sub>2</sub>I<sub>9</sub> solar cells.

| Temperature | $V_{oc}$ | $J_{sc}$              | FF    | PCE                      |
|-------------|----------|-----------------------|-------|--------------------------|
| [°C]        | [V]      | [mA/cm <sup>2</sup> ] | [%]   | [%]                      |
| RT          | 0.77     | 1.91                  | 67.10 | 0.99 (0.92) <sup>a</sup> |
| 60          | 0.78     | 1.83                  | 64.18 | 0.92 (0.86)              |
| 70          | 0.79     | 1.78                  | 62.85 | 0.88 (0.81)              |
| 80          | 0.77     | 1.74                  | 64.21 | 0.86 (0.78)              |
| 90          | 0.77     | 1.61                  | 62.56 | 0.78 (0.73)              |

<sup>a</sup>Data in parentheses stand for the average PCEs for 10 cells.

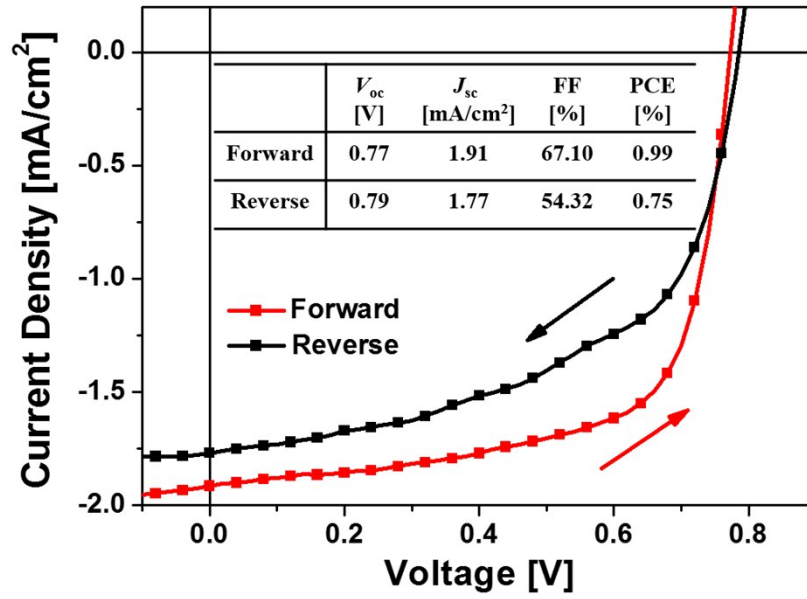

Fig. S6  $J$ - $V$  curves of CsAg<sub>2</sub>Sb<sub>2</sub>I<sub>9</sub> solar cell under different scans.

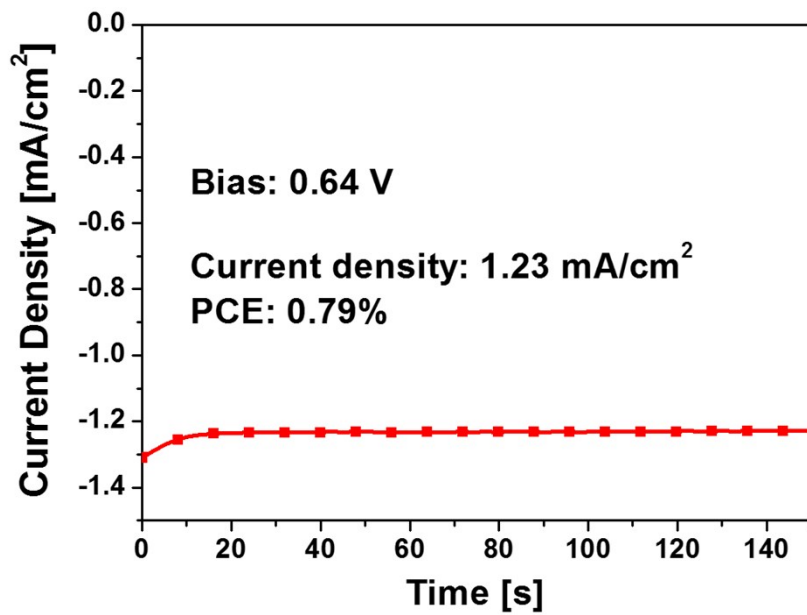

Fig. S7 Stable PCE for CsAg<sub>2</sub>Sb<sub>2</sub>I<sub>9</sub> solar cell.



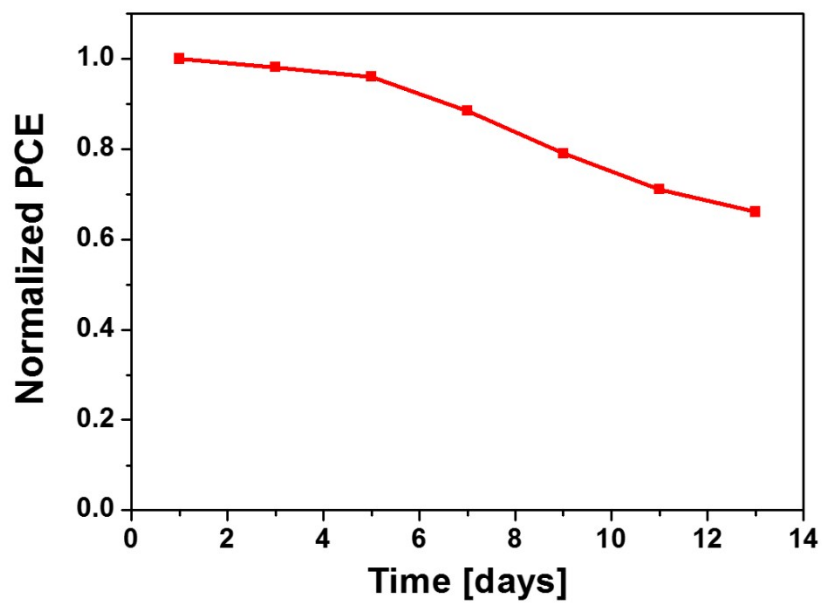

**Fig. S8** The stability of CsAg<sub>2</sub>Sb<sub>2</sub>I<sub>9</sub> solar cell in a N<sub>2</sub> glovebox.
